# Supplementary material
Source: PubMed Central journal article supplement (PMC3159576)
Supplement: NIHMS292433-supplement-1_si_001.pdf [file NIHMS292433-supplement-1_si_001.pdf]

## SUPPORTING INFORMATION

### **SUPPLEMENTARY METHODS**

*Western Blot.* Protein samples containing 5  $\mu$ g were separated by SDS PAGE using 12 % acrylamide gels. The protein bands were transferred to nitrocellulose membrane and rabbit serum containing anti-p24 antibody (NIH AIDS Reagents Program) was used at 1 : 100,000. A second anti-rabbit horseradish peroxidase-conjugated antibody (Jackson ImmunoResearch) at 1 : 10,000 and ECL - Western Blot Detection Reagents (GE Healthcare) was used to reveal the presence of cleaved and uncleaved GST-X-mV protein.

## SUPPLEMENTARY FIGURE LEGENDS

SUPPLEMENTARY FIGURE 1: Quality assessment of the GST-X-mV fusion protein. (a) Western blot analysis of GST-Gag processing by HIV-1 PR. 5  $\mu$ g GST-Gag (without mVenus) was incubated with 100 nM protease. Over time samples were removed and analyzed by SDS PAGE and western blot using anti-p24 antibody. Cleavage products appeared overtime, starting with p82, followed by p27, and then p25. (b) MALDI TOF MS spectrum of 10  $\mu$ M GST-Gag, not containing mVenus, after 2 hrs incubation with 25 nM HIV-1 PR demonstrating the various Gag cleavage products. (c) Time-resolved MALDI mass spectrometry (MS) analysis of protease-mediated GST-MA-CA (without mVenus) processing. Samples were taken over time and analyzed by MALDI MS. (d) The affinity matrix is not cleaved by HIV-1 PR. 5  $\mu$ g of the monoclonal anti-GST antibody was incubated with 100 nM HIV-1 PR, analyzed by SDS PAGE, and proteins detected by coomassie staining. The light and heavy chain of the antibody were not cleaved by protease.

SUPPLEMENTARY FIGURE 2: Determination of bead binding capacity for GST fusion proteins. (a) The binding of the GST fusion protein, GST-X-mV, to anti-GST antibody coated beads was analyzed to determine the bead binding capacity. For evaluation of bead saturation, differing amounts of GST-p2/NC<sub>CS</sub>-mV were incubated with 10<sup>6</sup> beads, washed, and then analyzed by flow cytometry. The fluorescence increases with higher concentrations of the fusion protein and follows a sigmoid curve in the semi-log plot. From the saturation plateau we estimate that approximately 0.5 -1.0 x 10<sup>6</sup> molecules of GST-p2/NC<sub>CS</sub>-mV bind per bead. (b). Emission scans of the fusion protein immobilized on beads. GST-MA/CA<sub>CS</sub>-mV or GST-4xG<sub>CS</sub>-mV was immobilized on beads and incubated with protease. The emission spectrum was recorded using a Tecan Sapphire fluorescence spectrometer. As can be seen protease does

not alter the spectral features of the mVenus protein. Experimental conditions:  $t = 60$  min;  $T = 37$  °C; [S: GST-MA/CA<sub>CS</sub>-mV or GST-4xG<sub>CS</sub>-mV] =  $10$   $\mu$ M; [PR] =  $50$  nM; excitation wavelength =  $488$ nm. (c) An alternative platform of the GST-X-mV fusion protein. The StrepII-MA-CA-mV fusion protein contains a Strep-tagII instead of the N-terminal GST anchor which binds to strepavidin-coated beads [38] (scheme: upper panel). The lower panel refers to a dilution series of StrepII-MA-CA-mV fusion protein. (d) On bead CE-CBA cleavage analysis of StrepII-MA-CA-mV using protease. StrepII-MA-CA-mV was immobilized on beads, incubated with protease, and then analyzed by flow cytometry. The protease-mediated processing of the MA/CA CS decreases the fluorescence on the beads, which can be quantified. Experimental conditions:  $t = 60$  min;  $T = 37$  °C; [S: StrepII-MA-CA-mV] =  $1$   $\mu$ M; [PR] =  $100$  nM.

SUPPLEMENTARY FIGURE 3: (a) Time resolved cleavage kinetics of the protease thrombin and the substrates GST-p2/NC<sub>CS</sub>-mV or GST-Thr<sub>CS</sub>-mV using on bead CE-CBA. GST-p2/NC<sub>CS</sub>-mV or GST-Thr<sub>CS</sub>-mV was immobilized on beads and incubated with thrombin. Over time samples were taken and analyzed by flow cytometry. The normalized fluorescence intensity vs. time plot showed a decrease of fluorescence intensity for the correct enzyme - substrate pair. The resulting values could be fitted using a single exponential equation. The incorrect enzyme-substrate pair showed no fluorescence decay. Experimental conditions:  $t = 60$  min;  $T = 37$  °C; [GST-Thr<sub>CS</sub>-mV] =  $1$   $\mu$ M; [thrombin] =  $8$  U, buffer =  $20$  mM Tris-HCL pH  $8.4$ ,  $150$  mM NaCl,  $2.5$  mM CaCl<sub>2</sub>. (b) Time resolved cleavage kinetics of HIV protease and the substrates GST-p2/NC<sub>CS</sub>-mV or GST-Thr<sub>CS</sub>-mV using on bead CE-CBA. The experiment was carried out as described previously in a. Only the HIV-1 substrate showed a fluorescence decay indicating cleavage of the appropriate substrate. Experimental conditions:  $t = 60$  min;  $T = 37$  °C; [GST-p2/NC<sub>CS</sub>-mV] =  $1$   $\mu$ M; [PR] =  $50$  nM; buffer =  $20$  mM MES pH  $6.0$ ,  $200$  mM NaCl,  $2.5$  % glycerol at  $37$  °C.

SUPPLEMENTARY FIGURE 4: Comparison of  $IC_{50}$  determination utilizing CE-CBA and fluorogenic substrate assay for the low affinity aspartyl peptidase inhibitor, pepstatin A and the high affinity HIV-1 inhibitor, amprenavir (a) Shown are the normalized rFU values vs. the  $\log[\text{inhibitor}]$  concentration plotted values of the in solution CE-CBA cleavage analysis. Selected concentrations of pepstatin A were incubated with  $0.025 \mu\text{M}$  PR and  $5 \mu\text{M}$  GST-MA/ $CA_{CS}$ -mV at  $37^\circ\text{C}$  and then captured on beads and analyzed by flow cytometry as described previously. The  $IC_{50}$  was determined using the 4 parameter logistic model from Origin 7.0. (b) Selected concentrations of pepstatin A were incubated with  $0.025 \mu\text{M}$  PR and  $30 \mu\text{M}$  of the fluorescently labeled anthranilyl protease substrate Abz-Thr-Ile-Nle-p-nitro-Phe-Gln-Arg-NH<sub>2</sub>, H2992. The initial velocity was calculated and the  $IC_{50}$  was determined using the 4 parameter logistic model by Origin 7.0. (c) CE-CBA-based  $IC_{50}$  analysis of amprenavir. Selected concentrations of amprenavir were incubated with  $0.0025 \mu\text{M}$  PR and  $5 \mu\text{M}$  GST-MA/ $CA_{CS}$ -mV at  $37^\circ\text{C}$  and then captured on beads and analyzed by flow cytometry as described previously. The  $IC_{50}$  for high affinity inhibitor was determined using the Morrison quadratic equation [21].

(d) FSA-based  $IC_{50}$  determination of amprenavir. A concentration series of the PI amprenavir was incubated with  $0.0025 \mu\text{M}$  PR and  $30 \mu\text{M}$  of the fluorescently labeled anthranilyl protease substrate, H2992. The initial velocity was calculated and the  $IC_{50}$  was determined using the Morrison quadratic equation [21]. Mean and standard deviation values are shown. Assessment of protease inhibitor potency, protease inhibitor resistance, and screening for new inhibitors has been aided through the use of FSA [22]. Since FSA is an accept standard methodology for obtaining  $IC_{50}$  values for protease inhibitors, we evaluated whether in solution CE-CBA produced similar or distinct  $IC_{50}$  values as compared to FSA for the moderate affinity  $\mu\text{M}$  protease inhibitor pepstatin A, and the high affinity, nM clinical HIV-1 protease inhibitor amprenavir. The  $IC_{50}$  values determined for pepstatin A,  $1.6 \pm 0.1 \mu\text{M}$ , and amprenavir,  $0.19 \pm$

0.05 nM, were obtained from in solution CE-CBA analysis of GST-MA/CA<sub>cs</sub>-Vm. Utilizing FSA, with the fluorescently labeled anthranilyl substrate Abz (aminobenzoyl)-Thr-Ile-Nle-p-nitro-Phe-Gln-Arg-NH<sub>2</sub>, the pepstatin A and amprenavir IC<sub>50</sub>s were found to be  $1.1 \pm 0.2 \mu\text{M}$  and  $0.18 \pm 0.03 \text{ nM}$ , respectively.

SUPPLEMENTARY FIGURE 5: Validation of the multiplexed HTS CE-CBA robustness. The Z'-factor is a statistical means to pre-quantify the suitability of a particular assay for use in a full-scale, high-throughput screen (36). Z'-factors in the range 0.5 - 1 indicate, with closer to 1 a better score, that the assay tested is highly suitable for use as a high-throughput screen. Shown are the rFU values from the positive control (without protease, indicating 100 % inhibition of protease processing) and negative control (with protease, indicating no inhibition of protease processing) of on bead CE-CBA using GST-CA-p2-mV (n = 3, each run 100 samples). The Z'-factor was calculated according to the equation by Zhang and co-workers:  $Z' \text{-factor} = 1 - (3\sigma_{(+)} + 3\sigma_{(-)})/|\mu_{(+)} - \mu_{(-)}|$ .  $\sigma_{(+)}$  and  $\sigma_{(-)}$  represents the standard deviation and  $\mu_{(+)} - \mu_{(-)}$  represents the positive and negative control mean values (36). The Z'-factor determined was  $0.837 \pm 0.003$  (mean  $\pm$  s.e.m.), indicating that the on bead GST-CA-p2-mV CE-CBA is suitable for high-throughput screening of inhibitors targeting Gag MA-CA or CA-p2.

**Supplementary Table 1**

| CS                  | PR   | $k_{\text{cat}}/K_M$ (mM <sup>-1</sup> s <sup>-1</sup> ) | fold increase |
|---------------------|------|----------------------------------------------------------|---------------|
| NC-p1(wt)*          | wt   | 37.5 ± 3.9                                               | 1.0           |
| NC-p1(K436E,I437V)* | wt   | 121.4 ± 7.7                                              | 3.2           |
| NC-p1(wt)           | wt   | 14.2 ± 0.2                                               | 1.0           |
| NC-p1(A431V)        | wt   | 30.9 ± 0.5                                               | 2.2           |
| NC-p1(wt)           | I84V | 4.1 ± 0.01                                               | 0.3           |
| NC-p1(A431V)        | I84V | 11.5 ± 0.9                                               | 0.8           |
| p1-p6(wt)           | wt   | 6.7 ± 0.2                                                | 1.0           |
| p1-p6(L449F)        | wt   | 29.7 ± 0.2                                               | 4.4           |
| p1-p6(wt)           | I84V | 1.6 ± 0.3                                                | 0.2           |
| p1-p6(L449F)        | I84V | 7.0 ± 0.3                                                | 1.0           |
| p1-p6(T456S)        | wt   | 13.8 ± 0.5                                               | 2.0           |

\* = experiment was carried out at 37 °C

$k_{\text{cat}}/K_M$  mean values and s.e.m. of wild type and mutant Gags and PRs were calculated from CE-CBA experiments (n = 3) as previously described.

**Supplementary Table 2**

| CS                 | PR | Rate (rFU s <sup>-1</sup> ) | fold increase |
|--------------------|----|-----------------------------|---------------|
| NC-p1(wt)          | wt | 77                          | 1.0           |
| NC-p1(A431V)       | wt | 185                         | 2.4           |
| NC-p1(K436E,I437V) | wt | 439                         | 5.7           |
| p1-p6(wt)          | wt | 946                         | 1.0           |
| p1-p6(L449F)       | wt | 6167                        | 6.5           |

Representative initial rate values of wild type and mutant Gags and PRs were calculated from CE-CBA experiments (n = 2).

**Supplementary Table 3**

| CS                 | PR | IC <sub>50</sub> (nM) | fold increase |
|--------------------|----|-----------------------|---------------|
| NC-p1(wt)          | wt | 0.19 ± 0.05           | 1.0           |
| NC-p1(A431V)       | wt | 0.17 ± 0.05           | 0.9           |
| NC-p1(K436E,I437V) | wt | 0.18 ± 0.05           | 0.9           |
| p1-p6(wt)          | wt | 0.17 ± 0.04           | 1.0           |
| p1-p6(L449F)       | wt | 0.21 ± 0.04           | 1.2           |

IC<sub>50</sub> mean values and s.e.m. of wild type and mutant Gag and PR were calculated from CE-CBA experiments (n = 3) as previously described

**a**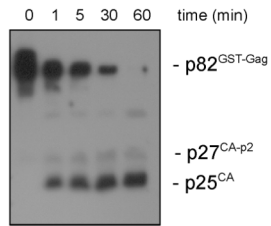**b**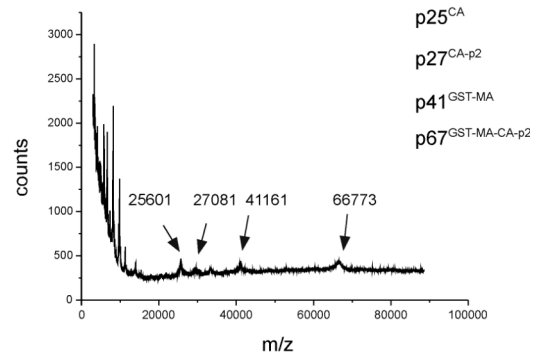**c**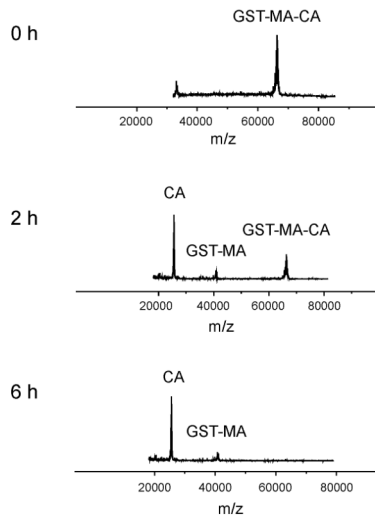**d**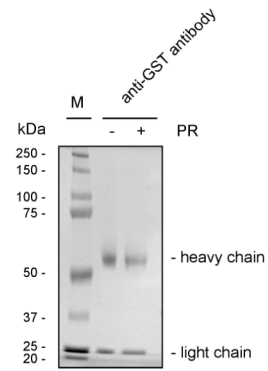

|           | MALDI MS determined MW | theoretical MW |
|-----------|------------------------|----------------|
| GST-MA-CA | = 66,320 Da            | 66,352 Da      |
| GST-MA    | = 40,725 Da            | 40,767 Da      |
| CA        | = 25,594 Da            | 25,603 Da      |

## Supplementary Figure 1



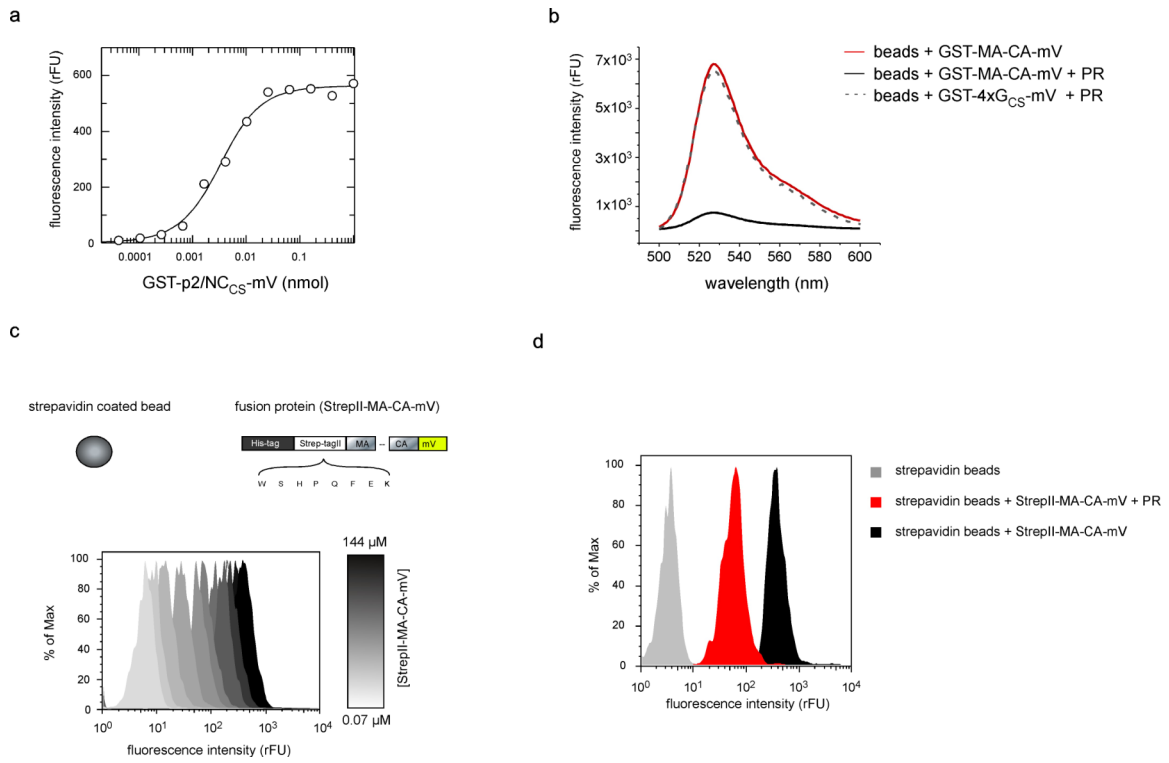

**Supplementary Figure 2**

**a**

Thrombin mediated-processing of Thr and p2/NC cleavage site

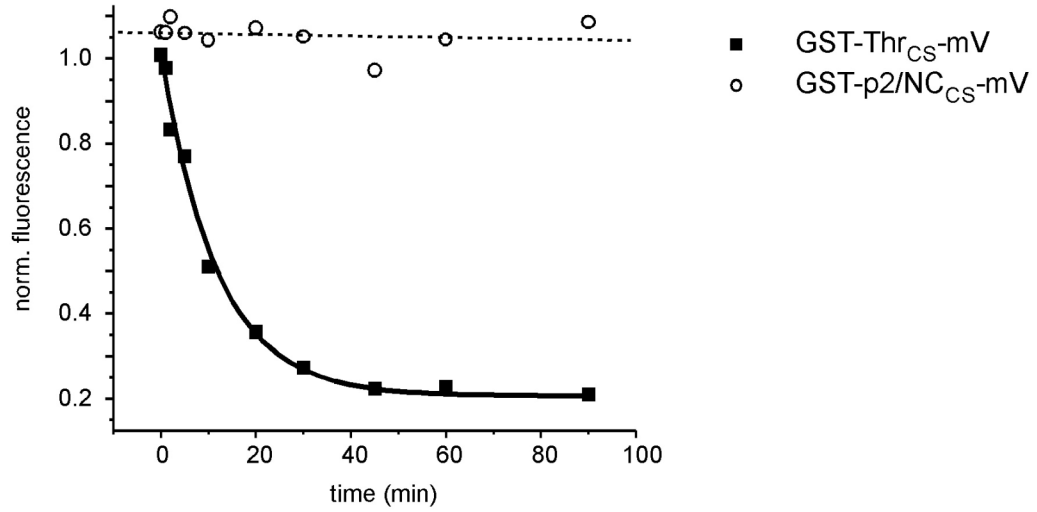

**b**

HIV-1 PR mediated-processing of a Thr and p2/NC cleavage site

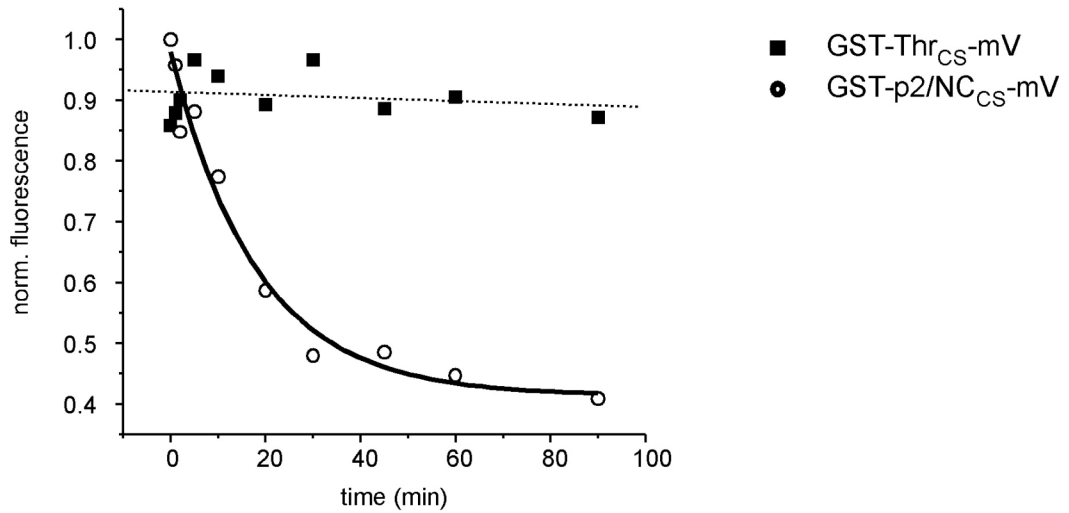

**Supplementary Figure 3**

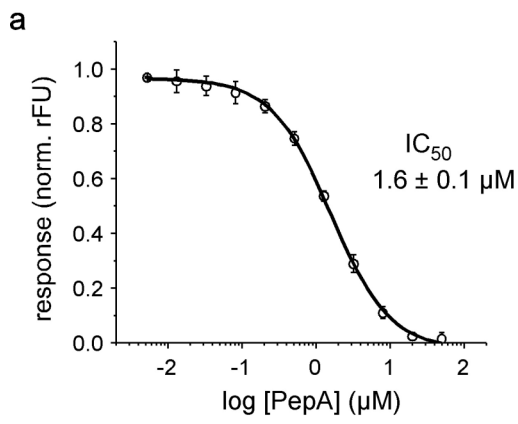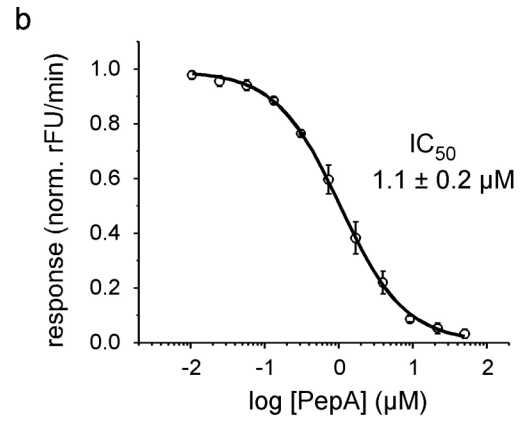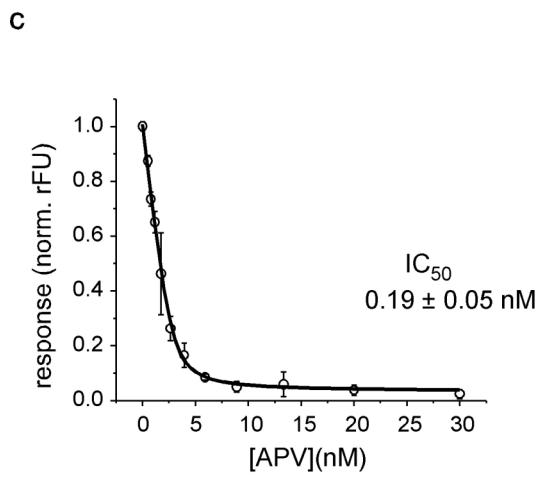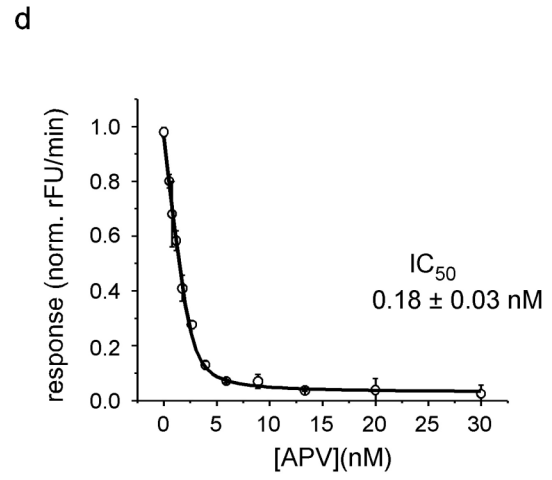

**Supplementary Figure 4**

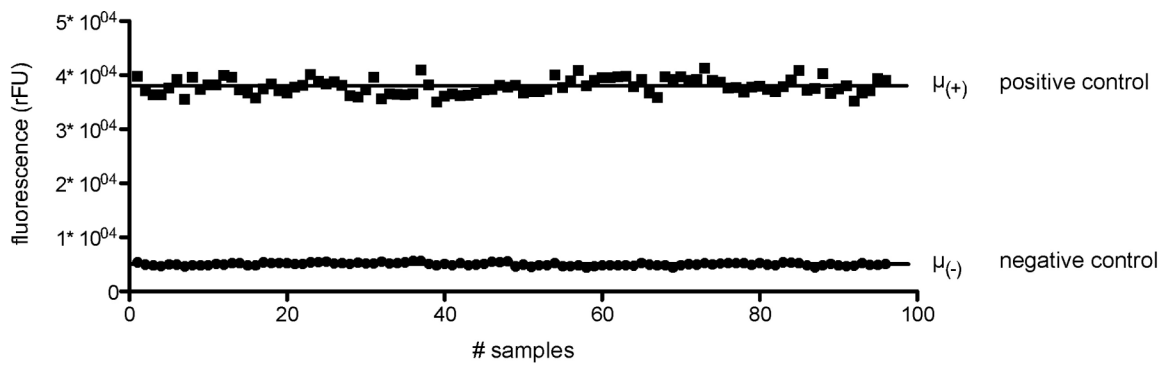

**Supplementary Figure 5**
